# Supplementary material for: Lipopolyplex-Mediated Co-Delivery of Doxorubicin and FAK siRNA to Enhance Therapeutic Efficiency of Treating Colorectal Cancer
Source: MDPI journal article supplement (doi:10.3390/pharmaceutics15020596), 2023-02-10
Supplement: s1 [file s1]

# Supplementary Materials: Lipopolyplex-Mediated Co-Delivery of Doxorubicin and FAK siRNA to Enhance Therapeutic Efficiency of Treating Colorectal Cancer

Tilahun Ayane Debele, Chi-Kang Chen, Lu-Yi Yu and Chun-Liang Lo

## Synthesis and identification of MABH monomer

The synthesis of monomeric MABH was achieved using the methacrylic chloride (MACl) with tert-butyl carbazate (Boc-hydrazide). Briefly, the Boc-hydrazide and 1.5 times the molar Triethylamine (TEA) placed in a two-necked flask, dissolved under a nitrogen atmosphere, and uniformly mixed with DCM. After dissolving MACl in DCM, it was added drop wise into a two-necked flask through a feeding tube and reacted for 12 hours. After completion of the reaction, most of the TEA·HCl salts were first removed by gravity filtration followed by sequential extraction with 0.1 N HCl (aq), saturated NaHCO<sub>3</sub> (aq) and saturated brine to remove excess MACl and TEA. The resulting organic solution layer was removed with MgSO<sub>4</sub>, the solids were removed by filtration, the organic solution was removed by rotary evaporation and finally a white solid was obtained after recrystallization from a solution of Hexane (v: v = 1: 1) in ethyl acetate. The dried product was identified by <sup>1</sup>H-NMR and FT-IR. For <sup>1</sup>H-NMR, 5-6 mg / ml of the sample was dissolved with DMSO-d<sub>6</sub> and analyzed by proton nuclear magnetic resonance spectroscopy. The FT-IR sample is obtained by dissolving the product in DCM and analyzing the chemical structure by the thin film method.

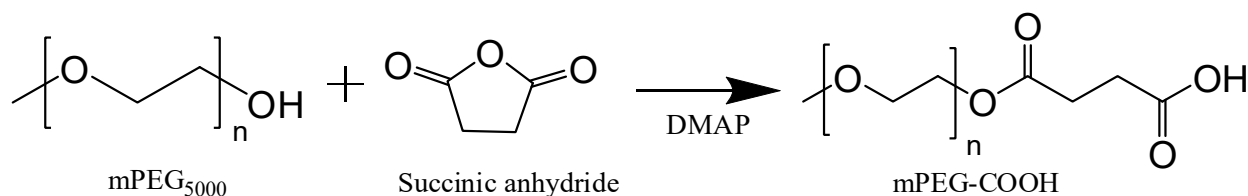

**Scheme S1.** mPEG5000-COOH modification steps.

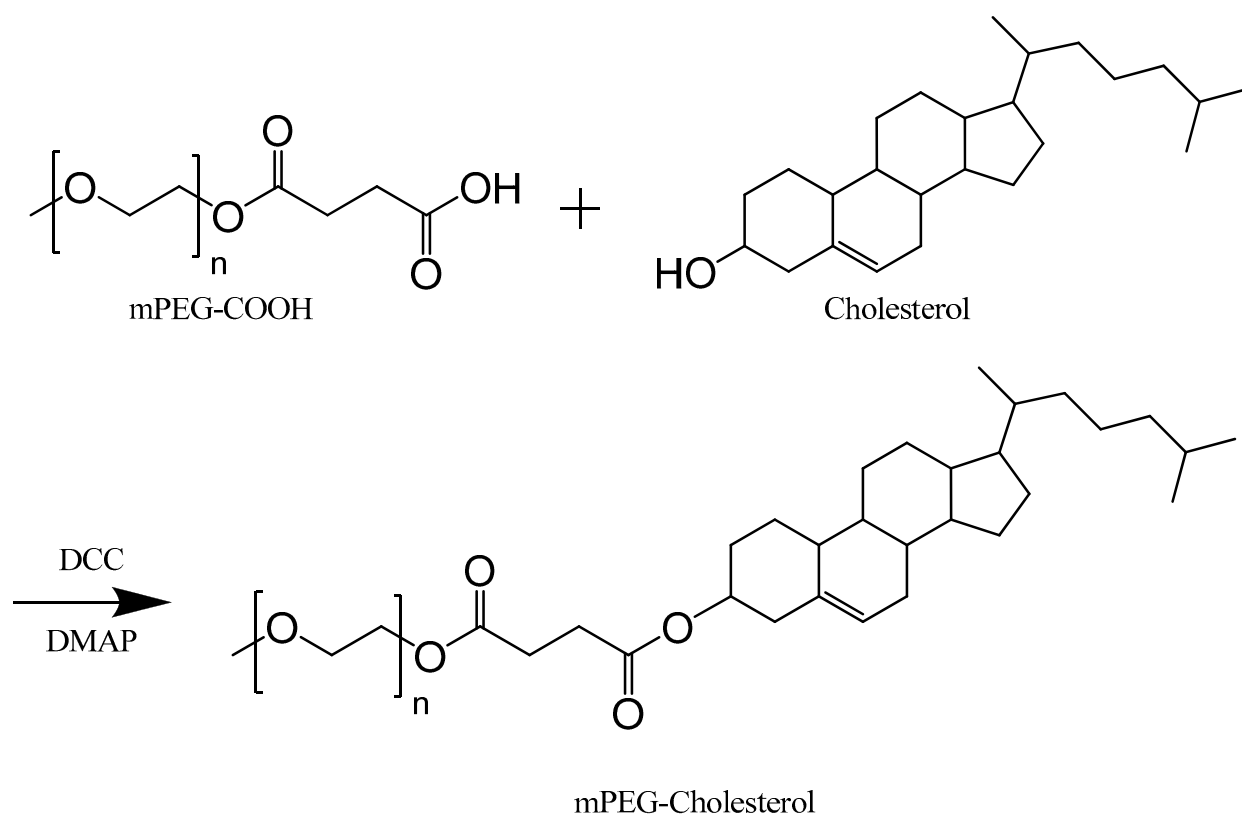

**Scheme S2.** Synthesis of mPEG5000-cholesterol.

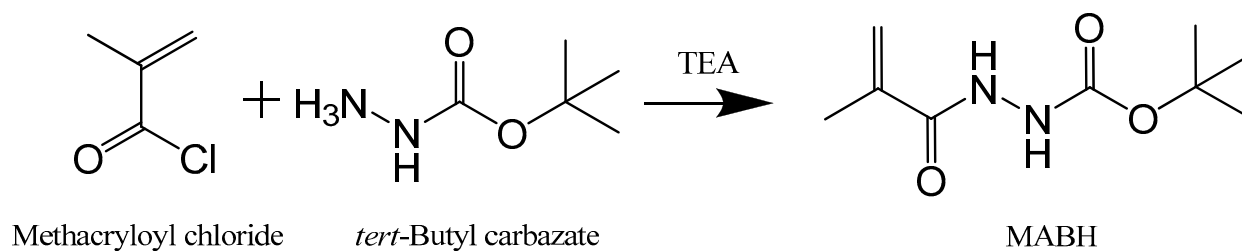

**Scheme S3.** Synthesis of free radical monomer MABH.

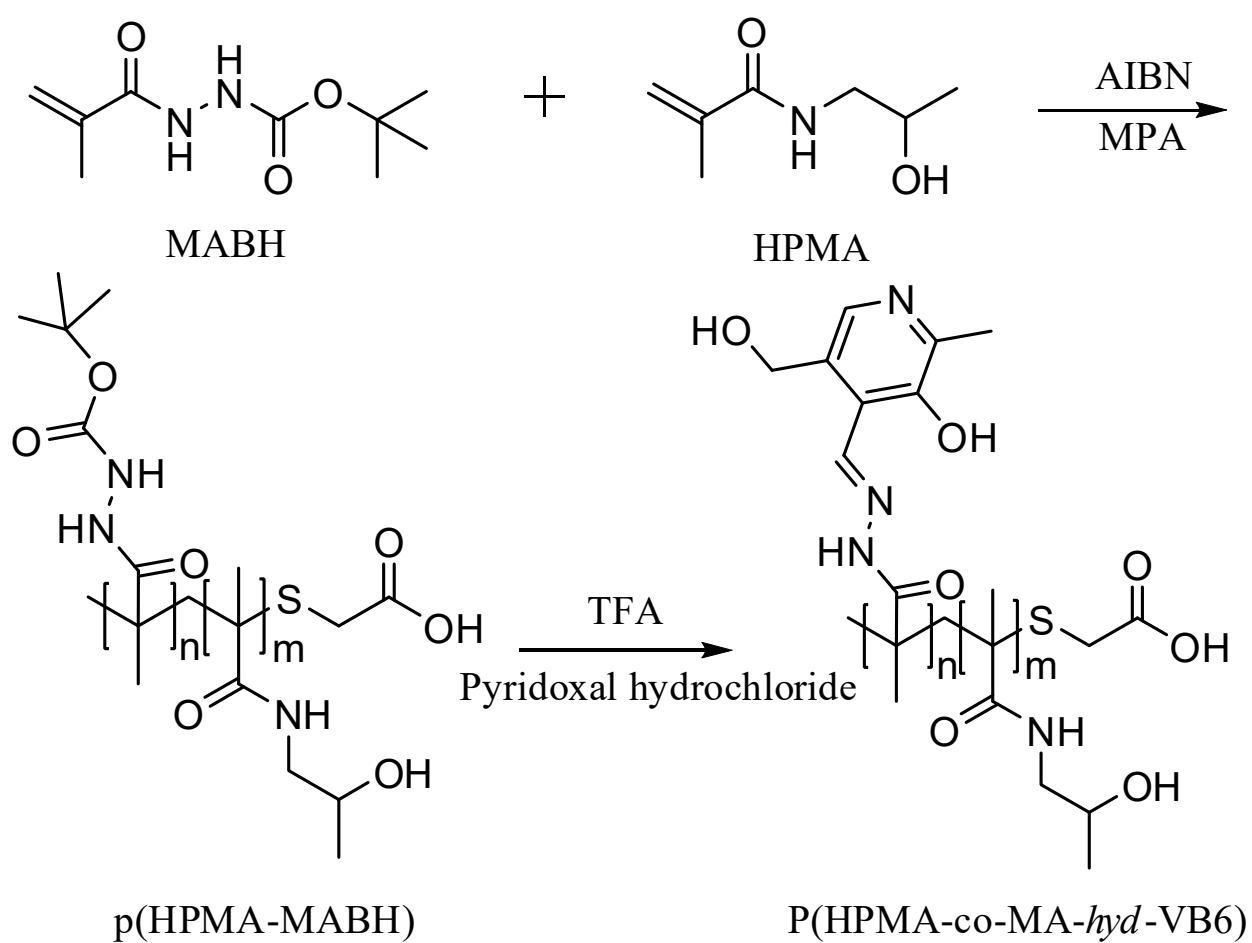Scheme S4. Synthesis of P(HPMA-co-MA-*hyd*-VB6) copolymers.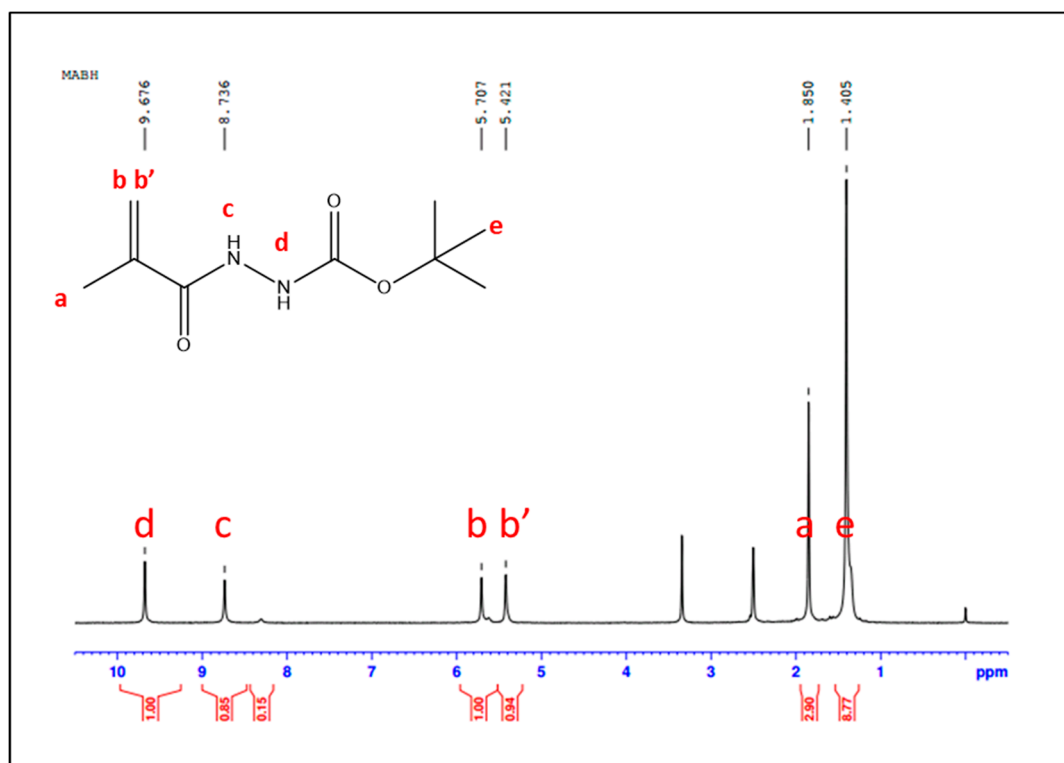Figure S1. <sup>1</sup>H-NMR spectra of monomer MABH.

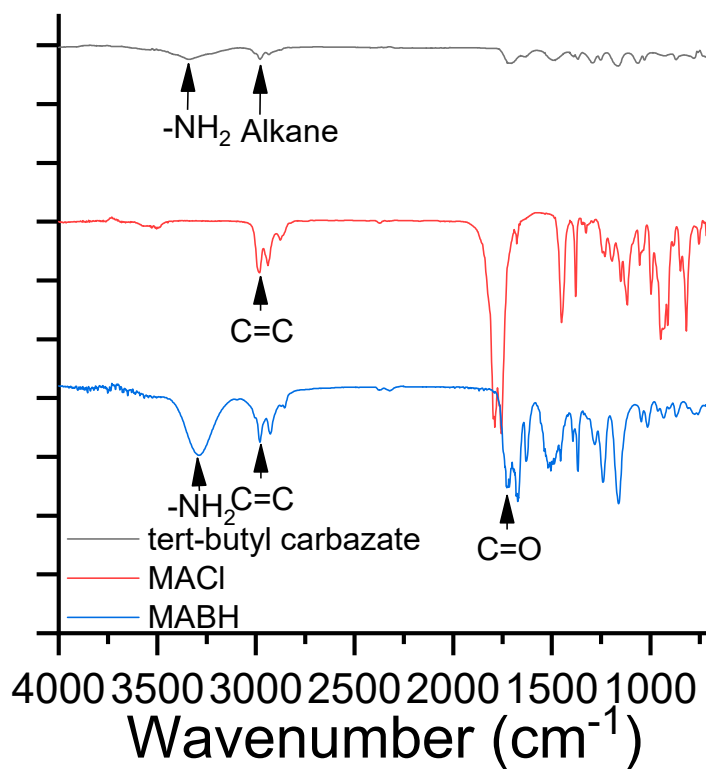

Figure S2. FT-IR spectrum of monomer MABH.

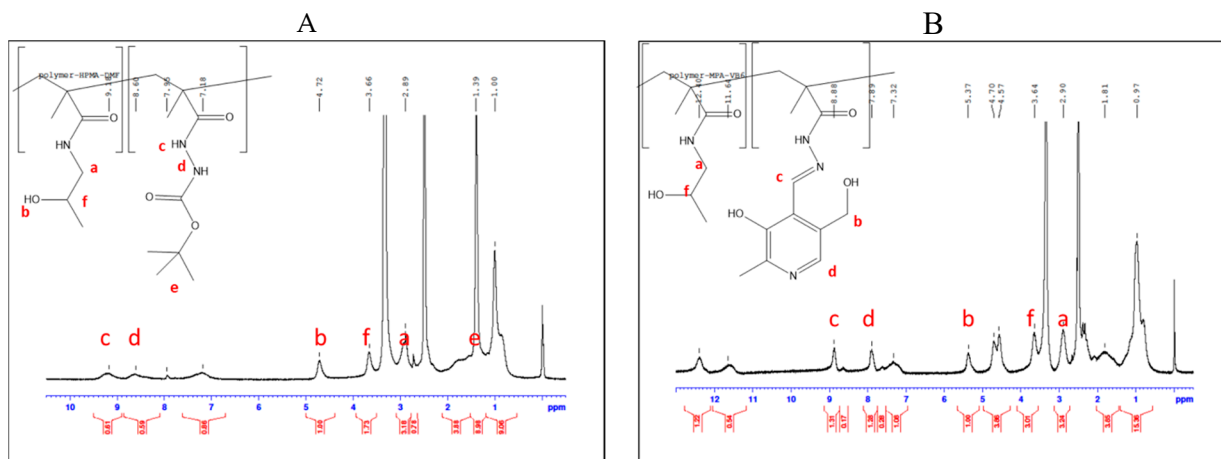

Figure S3.  $^1\text{H}$ -NMR spectrum of (A) P(HPMA-co-MABH) copolymers and (B) P(HPMA-co-MA-hyd-VB6) copolymers.

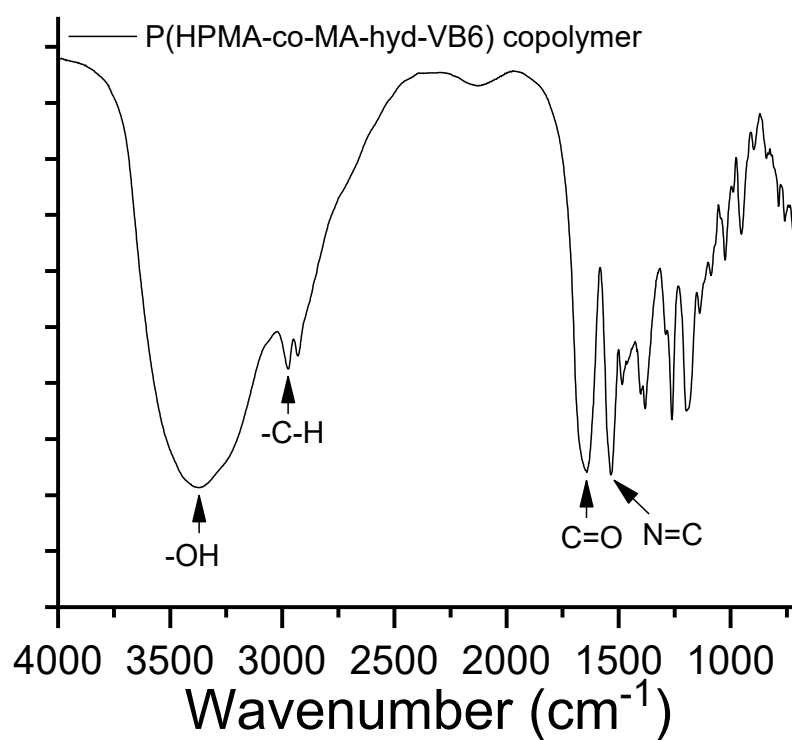

Figure S4. FT-IR spectrum of P(HPMA-co-MA-hyd-VB6) copolymers.

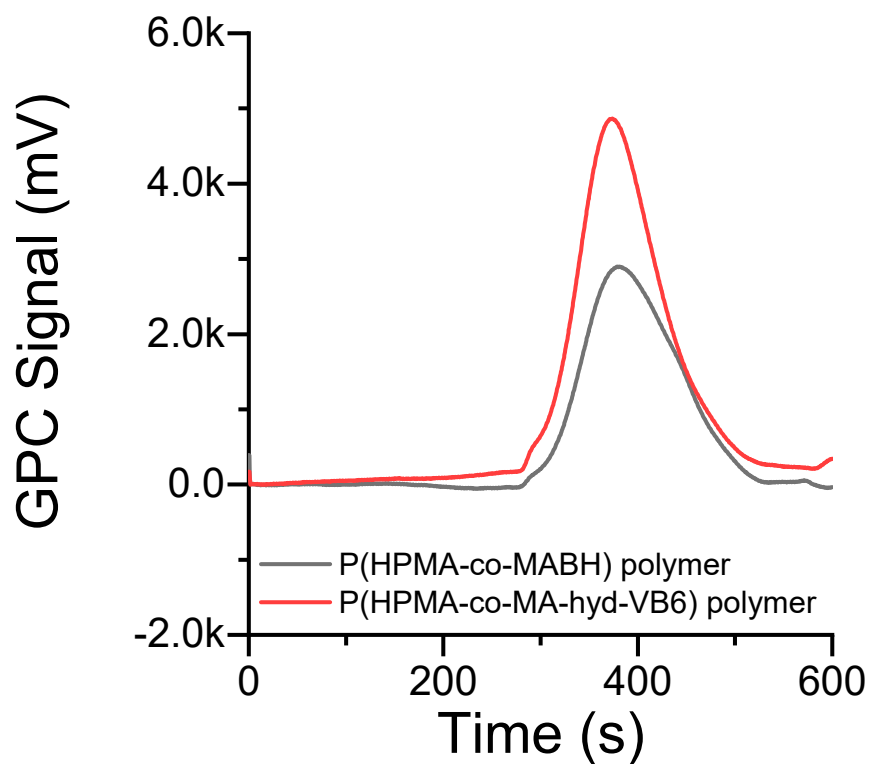

Figure S5. The GPC chromatography of P(HPMA-co-MABH) and P(HPMA-co-MA-hyd-VB6) copolymers.

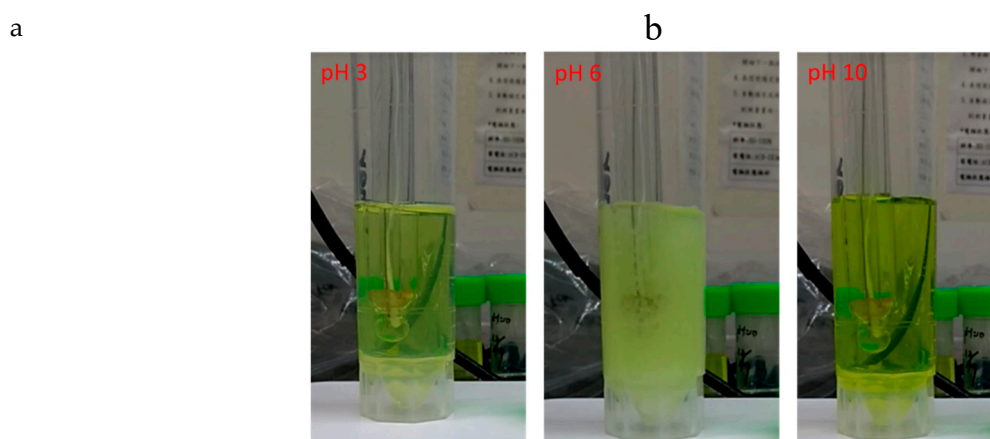

**Figure S6.** The proton absorption test of P10K45 copolymers. (a) The titration of P10K45 copolymers treated with 0.05 N NaOH. (b) The phase changes of copolymer solution at pH 3, pH 6 and pH 10.

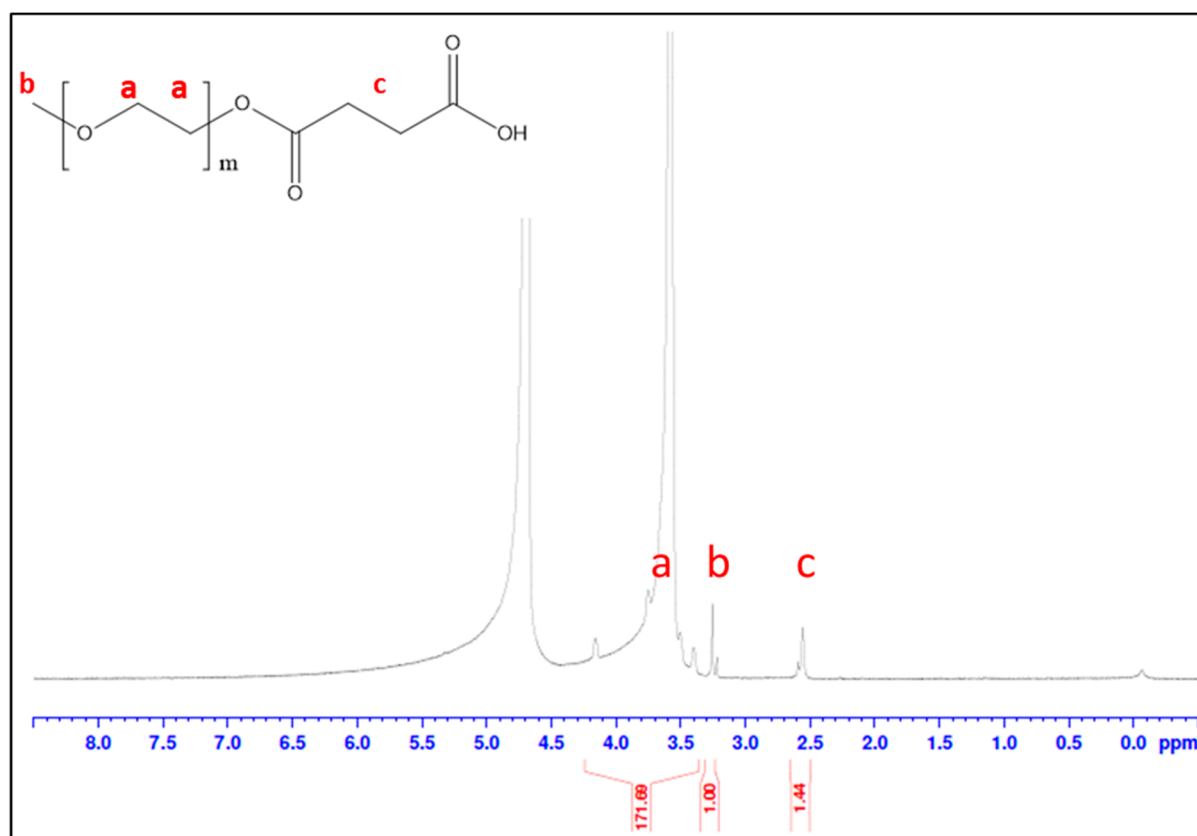

**Figure S7.**  $^1\text{H}$ -NMR spectrum of mPEG-COOH.  $^1\text{H}$  NMR mPEG-COOH ( $\text{D}_2\text{O}$ ):  $\delta$  2.5–2.6 ( $-\text{CH}_2-\text{CH}_2-$  from succinic acid);  $\delta$  3.2–3.3 ( $-\text{O}-\text{CH}_3$  from mPEG5000);  $\delta$  3.4–4.2 ( $-\text{O}-\text{CH}_2-\text{CH}_2-\text{O}-$  from mPEG5000).

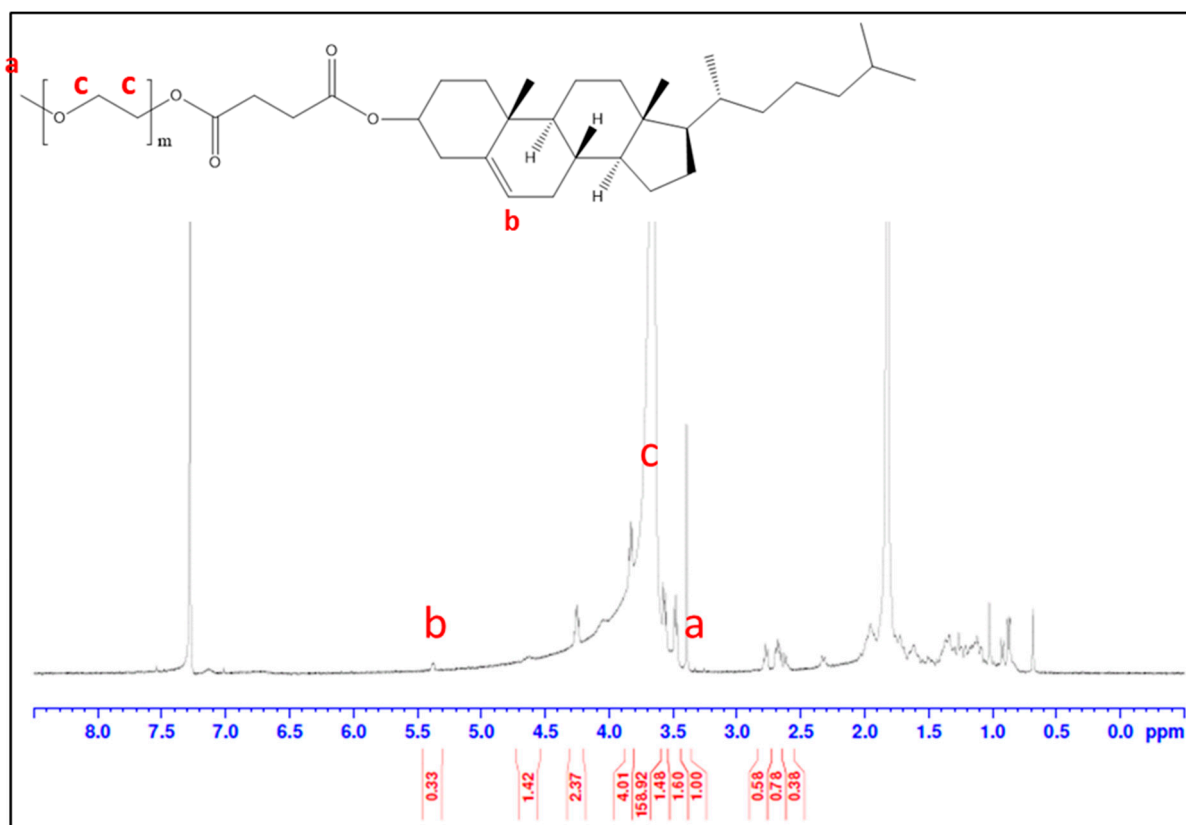

**Figure S8.** <sup>1</sup>H-NMR spectrum of mPEG-cholesterol. <sup>1</sup>H-NMR (CDCl<sub>3</sub>) of mPEG-cholesterol δ-3.2-3.3 (-O-CH<sub>3</sub> from mPEG5000); δ 3.4-4.2 (-O-CH<sub>2</sub>-CH<sub>2</sub>-O- from mPEG5000); δ 5.3-5.5 (-CH = CH<sub>2</sub>- from cholesterol).

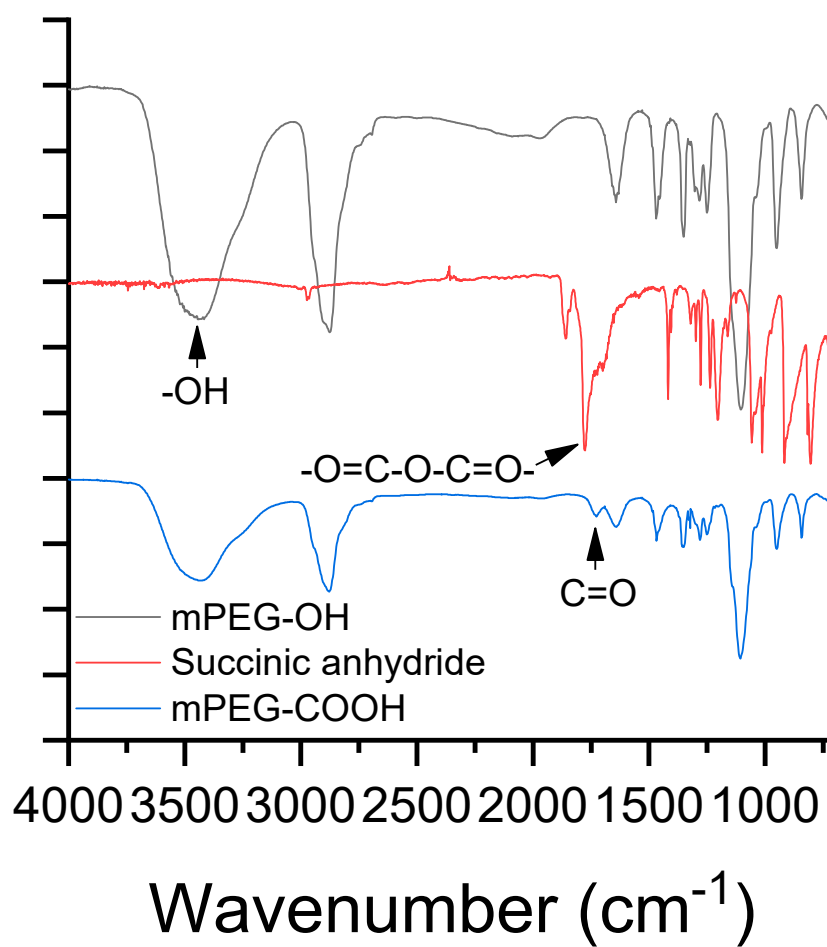

**Figure S9.** FT-IR spectrum of mPEG-COOH. FT-IR of mPEG-COOH at 1700  $\text{cm}^{-1}$  (-C-CO-O-CO-C-bond); 3500  $\text{cm}^{-1}$  (-OH bond).



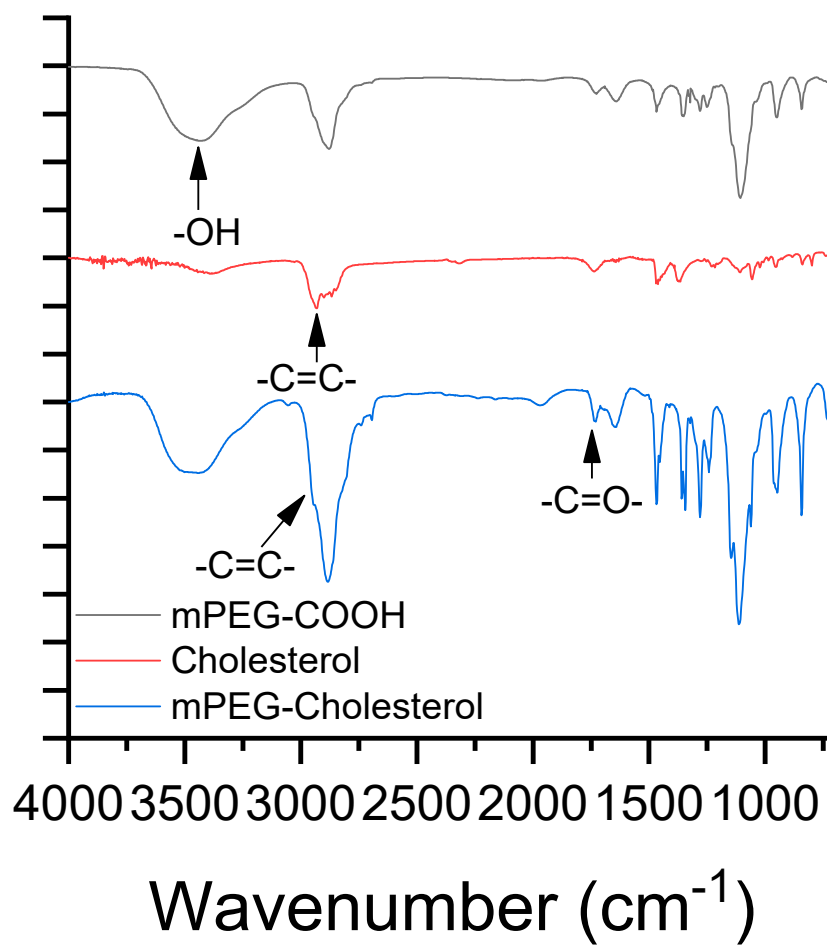

**Figure S10.** FT-IR spectra of mPEG-cholesterol. mPEG-cholesterol FT-IR at 3000  $\text{cm}^{-1}$  (C = C bond); 3400  $\text{cm}^{-1}$  (-OH bond).

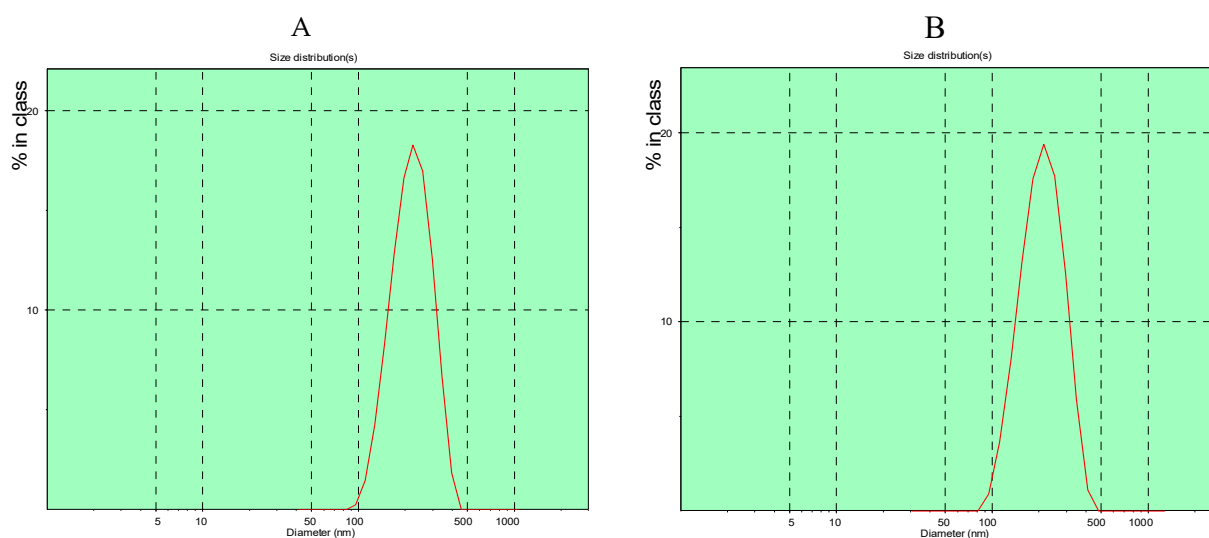

**Figure S11.** The particle size distribution of (A) LP and (B) DLP lipopolyplexes.

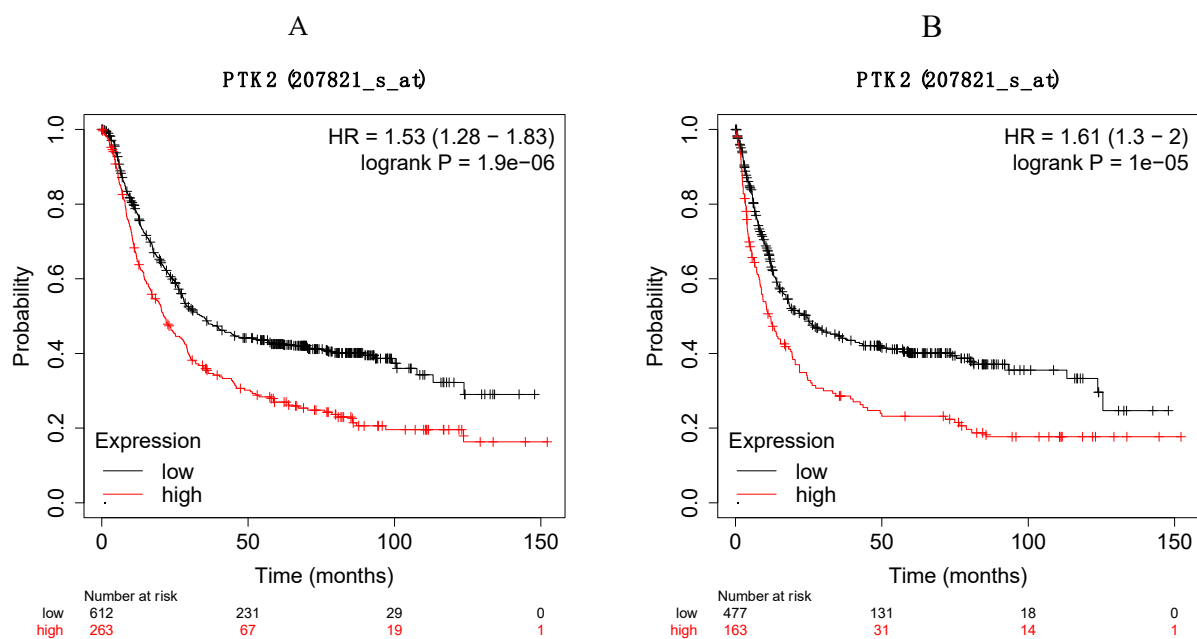

**Figure S12.** The Kaplan–Meier plot of progression-free survival (PFS) and overall survival (OS) according to FAK expression status in gastric cancer patients. The p-value for the differences between the two curves was determined using the log-rank test. (A) OS for the overall population. ( $n = 875$ , log-rank test:  $p = 1.9\text{e-}06$ ) (B) PFS for the overall population. ( $n = 640$ , log-rank test:  $p = 1\text{e-}05$ ).
